# Supplementary material
Source: Springer Nature journal article supplement (https://www.springermedizin.de/resource/supplementary/12993_2012_452_MOESM5_ESM.pdf/9617790)

**A**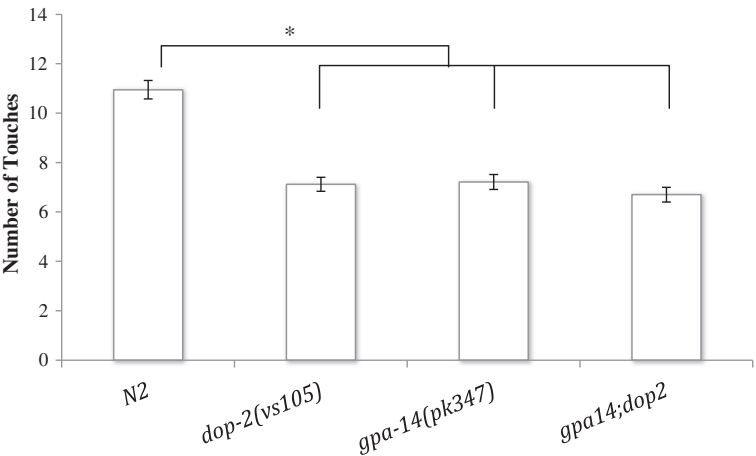**B**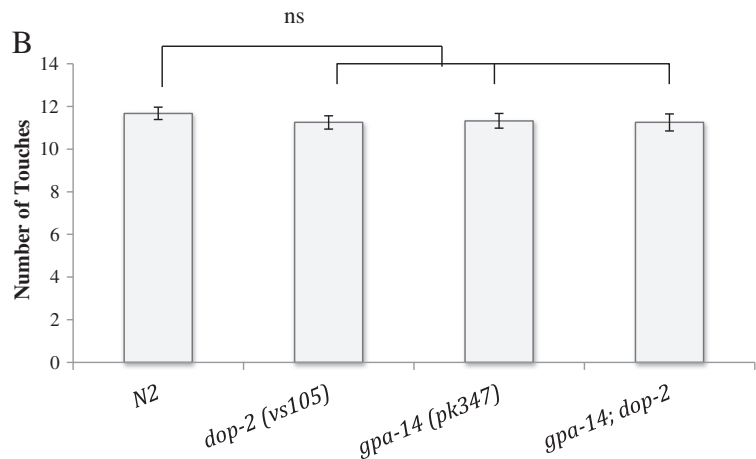

Supplement: MOESM5 [file 9617790]
